# Supplementary material for: Elucidation of the compatible interaction between banana and Meloidogyne incognita via high-throughput proteome profiling
Source: PLoS One. 2017 Jun 2;12(6):e0178438. doi: 10.1371/journal.pone.0178438 (PMC5456091; doi:10.1371/journal.pone.0178438)
Supplement: S1 Table — (XLSX) [file pone.0178438.s001.xlsx]

## Sheet: Sheet2
Table S1 Comparison between transcriptomic data obtained in [42] and proteomic data from the current study revealed that 71 A genome banana genes in the current study out of 77 obtained in [42] were significantly modulated during banana-Meloidogyne incognita interaction.
				Castaňeda et al. 2017 [42]												Al-Idrus et al. (current study)
				4279-06						CAV						GN
				3 DAI		7 DAI		10 DAI		3 DAI		7 DAI		10 DAI		30 DAI	60 DAI
	Number	Gene	Product	logFC	FDR	logFC	FDR	logFC	FDR	logFC	FDR	logFC	FDR	logFC	FDR	Fold-change
1	165	GSMUA_Achr6G25660_001	PI-PLC X domain-containing protein At5g67130 At5g67130 fragment	-1.66224	0.0165756	-0.322919	1	0.088715	1	-0.0423552	1	-1.45621	0.260896	-0.376529	1	-	-3
2	516	GSMUA_Achr8G12370_001	Peroxidase 5 GSVIVT00037159001 complete	-0.615698	1	0.571374	1	1.42522	1	1.89621	0.077242	-0.695579	1	1.04648	1	-	-8.2
3	2668	GSMUA_Achr3G00720_001	60S ribosomal protein L22-2 RPL22B complete	-0.652769	0.58391	0.00779047	1	0.396587	1	-0.033562	1	-0.140338	1	-0.207231	1	-	I
4	2777	GSMUA_Achr6G04600_001	Tubulin beta-1 chain TUBB1 complete	0.606359	0.600401	0.0518087	1	-0.164386	1	-0.448005	1	0.366573	1	-0.145227	1	-	-201.5
5	3376	GSMUA_Achr3G18600_001	40S ribosomal protein S27-2 RPS27B modules	-0.558132	0.672384	0.0581203	1	0.0598916	1	-0.223345	1	-0.0658015	1	-0.134077	1	-	3.7
6	4465	GSMUA_Achr4G05250_001	Lignin-forming anionic peroxidase GSVIVT00023967001 complete	0.44957	0.756641	0.556418	1	-0.388752	1	-0.157257	1	0.856861	0.984159	0.0772273	1	-	-4.1
7	4557	GSMUA_Achr10G16040_001	OsAPx7 - Stromal Ascorbate Peroxidase encoding gene 5,8, expressed APXS complete	-0.477851	0.756641	-0.0126598	1	0.133073	1	-0.206718	1	-0.547078	1	-0.0280656	1	-	-5.4
8	4826	GSMUA_Achr1G17170_001	40S ribosomal protein S15a-1 RPS15AA fragment	-3.71405	0.756641	2.48084	1	2.53335	1	-1.32946	1	-2.24e-15	1	0.81277	1	-	29.4
9	6265	GSMUA_Achr10G03730_001	Actin-2 ACT2 complete	0.413058	0.779385	0.317678	1	0.0521074	1	-0.307221	1	-0.110736	1	-0.315571	1	-	-1.8
10	6652	GSMUA_Achr6G02850_001	Probable ATP synthase 24 kDa subunit, mitochondrial At2g21870 complete	-0.415206	0.788786	0.082795	1	0.304177	1	-0.192299	1	-0.441458	1	-0.190657	1	-	-2.2
11	6885	GSMUA_Achr7G00560_001	Probable mitochondrial-processing peptidase subunit beta At3g02090 complete	-0.448239	0.797489	-0.223309	1	0.367468	1	-0.134905	1	-0.271957	1	0.135073	1	-	-1.7
12	7866	GSMUA_Achr2G20380_001	40S ribosomal protein S14 RPS14C modules	-0.382094	0.862745	-0.0670813	1	0.0599286	1	-0.286045	1	-0.120694	1	-0.211636	1	-	22
13	8384	GSMUA_Achr2G16250_001	Heat shock cognate 70 kDa protein HSP70 fragment	0.4995	0.884086	-0.282004	1	-0.525113	1	0.309894	1	0.309188	1	-0.241975	1	-	-4.9
14	10269	GSMUA_Achr1G21820_001	40S ribosomal protein Sa-2 RPSaB complete	-0.338303	0.965623	0.0383312	1	0.146658	1	-0.11302	1	-0.330121	1	-0.0927557	1	-	2.4
15	10644	GSMUA_Achr10G27350_001	ATP synthase subunit d, mitochondrial At3g52300 complete	-0.301867	0.980234	0.171362	1	0.491746	1	-0.239919	1	-0.422284	1	-0.0214327	1	-	-1.6
16	10807	GSMUA_Achr2G01640_001	40S ribosomal protein S4 RPS4 complete	-0.306906	0.982738	-0.0167839	1	0.183136	1	-0.0701539	1	-0.296653	1	-0.187108	1	-	3.4
17	11017	GSMUA_Achr1G22970_001	Probable lipoxygenase 4 Os03g0700700 complete	0.353144	0.992293	0.100479	1	0.323862	1	-0.321025	1	-0.102871	1	-0.46829	1	-2.3
18	12493	GSMUA_Achr4G21470_001	5-methyltetrahydropteroyltriglutamate--homocysteine methyltransferase METE complete	-0.0529813	1	-0.0192057	1	0.46326	1	0.857981	1	-0.764125	0.714708	0.34178	1	-	2.9
19	12619	GSMUA_Achr2G05440_001	Putative Fasciclin-like arabinogalactan protein 2 FLA2 complete	-0.251881	1	-0.0558056	1	0.982568	1	0.84954	1	-0.901335	0.828823	-0.535032	1	not in Inoculated sample
20	12700	GSMUA_Achr5G17510_001	Monodehydroascorbate reductase, chloroplastic At1g63940 complete	-0.106891	1	-0.085667	1	0.203586	1	-0.0075749	1	-0.70405	0.897631	0.0697147	1	-	-15.3
21	13483	GSMUA_Achr10G08050_001	Dihydrolipoyllysine-residue acetyltransferase component 3 of pyruvate dehydrogenase complex, mitochondrial At1g54220 complete	-0.0514753	1	-0.10947	1	-0.176522	1	0.0985984	1	-0.410457	1	0.131751	1	-	-1.8
22	13927	GSMUA_Achr10G15400_001	Putative Pyruvate kinase, cytosolic isozyme At4g26390 complete	-0.155608	1	-0.276341	1	0.410935	1	-0.048816	1	-0.575753	1	-0.417864	1	-	5.2
23	13982	GSMUA_Achr10G16420_001	Probable fructokinase-2 At1g06030 complete	1.53e-15	1	-9.03e-17	1	2.57e-16	1	0.969395	1	-2.24e-15	1	0.825578	1	-	I
24	15021	GSMUA_Achr11G01170_001	Aconitate hydratase 2, mitochondrial ACO2 complete	-0.135315	1	-0.129122	1	0.157484	1	-0.141713	1	-0.444278	1	0.210834	1	-	-2.5
25	15210	GSMUA_Achr11G04110_001	Putative uncharacterized protein MSBP2 complete	-0.0828171	1	0.253868	1	0.115081	1	-0.290625	1	-0.031754	1	-0.0165326	1	-	-2.7
26	15453	GSMUA_Achr11G08060_001	V-type proton ATPase catalytic subunit A CVA69.24 complete	0.220191	1	-0.0364106	1	-0.0468557	1	-0.338184	1	-0.0283088	1	-0.138503	1	-	3.5
27	15656	GSMUA_Achr11G11150_001	Fructokinase-2 FRK2 complete	0.0751542	1	-0.199184	1	0.457322	1	0.524788	1	0.019601	1	-0.376455	1	-	829.8
28	16990	GSMUA_Achr1G05110_001	Isocitrate dehydrogenase [NADP] IDH1 complete	0.136552	1	0.124134	1	-0.173832	1	0.0191705	1	-0.31388	1	-0.759708	1	-	Detected only in Inoculated sample
29	17624	GSMUA_Achr1G14710_001	T-complex protein 1 subunit zeta CCT6A complete	0.290415	1	-0.146968	1	-0.227728	1	-0.12924	1	-0.0862247	1	0.350644	1	-	Detectedonly in Inoculated sample
30	17959	GSMUA_Achr1G19640_001	Enoyl-[acyl-carrier-protein] reductase [NADH], chloroplastic fabI complete	-0.0872465	1	-0.243814	1	-0.387791	1	-0.247823	1	-0.085868	1	-0.0649758	1	-	Detected only in Inoculated sample
31	18318	GSMUA_Achr1G25160_001	Germin-like protein 5-1 Os05g0277500 complete	-0.252608	1	0.291167	1	0.147955	1	-0.0497556	1	0.150219	1	-0.927934	1	-	-2.7
32	18540	GSMUA_Achr2G00250_001	Adenosine kinase 2 ADK2 complete	0.0254821	1	-0.0361828	1	0.180376	1	0.404095	1	-0.45275	1	-0.478387	1	-	Detected only in Inoculated sample
33	19454	GSMUA_Achr2G14320_001	Isoflavone reductase homolog IRL complete	-0.173921	1	0.094457	1	0.579405	1	0.0561269	1	-0.0614503	1	-0.821168	1	-	10.3
34	20802	GSMUA_Achr3G12480_001	Heat shock 70 kDa protein, mitochondrial HSP1 complete	0.227614	1	0.0745747	1	0.0107803	1	-0.237108	1	-0.0835792	1	0.18575	1	-	2.5
35	21705	GSMUA_Achr3G26630_001	Uncharacterized protein At5g10860, mitochondrial At5g10860 complete	0.0207352	1	0.0342419	1	-0.0165877	1	-0.0865318	1	0.330151	1	-0.305974	1	-	-2.4
36	22147	GSMUA_Achr4G01020_001	Elongation factor 2 eft1 complete	0.227263	1	0.0577233	1	-0.00247865	1	-0.203529	1	-0.35705	1	-0.054094	1	-	Detected only in Inoculated sample
37	22489	GSMUA_Achr4G06150_001	Probable cinnamyl alcohol dehydrogenase CAD complete	-0.226225	1	0.10328	1	-0.114811	1	0.409696	1	0.189595	1	0.869177	1	-	Detected only in Inoculated sample
38	22602	GSMUA_Achr4G08110_001	Aspartate aminotransferase, cytoplasmic Os01g0760600 complete	-0.266782	1	0.0274572	1	0.174886	1	0.198636	1	-0.599313	1	-0.461391	1	-	Detected only in Inoculated sample
39	22635	GSMUA_Achr4G08580_001	Malate dehydrogenase, mitochondrial MMDH complete	-0.210787	1	-0.0576456	1	0.190058	1	-0.0767393	1	-0.194812	1	-0.204138	1	-	-2.2
40	23029	GSMUA_Achr4G14260_001	Hypothetical protein MAF1 missing_functional_completeness	-0.160126	1	0.208555	1	0.0146629	1	-0.149647	1	-0.157559	1	-0.156391	1	-	-2.2
41	23396	GSMUA_Achr4G20110_001	Probable plastid-lipid-associated protein 2, chloroplastic PAP2 complete	0.0507555	1	0.0672638	1	0.00295595	1	-0.153129	1	0.0171294	1	0.134894	1	-	-6
42	23553	GSMUA_Achr4G22700_001	5-methyltetrahydropteroyltriglutamate--homocysteine methyltransferase MET complete	0.270945	1	0.407732	1	0.607898	1	0.875125	1	-0.0730122	1	0.216315	1	-	3.2
43	24422	GSMUA_Achr5G03060_001	60S ribosomal protein L4-1 RPL4A complete	-0.178574	1	-0.080412	1	0.309116	1	0.0501751	1	-0.23682	1	-0.236613	1	-	3.2
44	25388	GSMUA_Achr5G18440_001	Germin-like protein 5-1 Os05g0277500 complete	-0.275231	1	-0.414384	1	0.121993	1	0.283331	1	0.20354	1	0.72188	1	-	-7.5
45	25802	GSMUA_Achr5G25000_001	Pyruvate dehydrogenase E1 component subunit beta, mitochondrial PDH2 complete	-0.00607438	1	-0.0434402	1	0.197584	1	-0.125625	1	-0.118768	1	-0.206941	1	-	-3.7
46	25828	GSMUA_Achr5G25410_001	Glyceraldehyde-3-phosphate dehydrogenase, cytosolic 3 GAPC3 complete	-0.11002	1	0.0636102	1	0.210869	1	-0.0866689	1	-0.114253	1	0.0213518	1	-	468.9
47	26157	GSMUA_Achr6G00740_001	3-hydroxyisobutyryl-CoA hydrolase-like protein 3 At4g13360 complete	0.0482022	1	-0.00860696	1	0.018454	1	-0.277234	1	-0.105446	1	0.012288	1	-	-2
48	26435	GSMUA_Achr6G05080_001	UDP-glucuronic acid decarboxylase 1 UXS1 fragment	-0.0419744	1	0.171649	1	0.168213	1	0.698848	1	-0.423086	1	-0.205448	1	-	4.4
49	26767	GSMUA_Achr6G10220_001	Putative SEC12-like protein 2 STL2P complete	0.0207901	1	0.0147234	1	-0.0895632	1	0.0328999	1	-0.0921938	1	-0.0589571	1	-	Detected only in Inoculated sample
50	26810	GSMUA_Achr6G10890_001	Sucrose synthase 2 SUS1 complete	0.142001	1	-0.0783369	1	0.896335	1	0.762179	1	-0.420806	1	-0.264441	1	-	2.1
51	27126	GSMUA_Achr6G15820_001	Alpha-galactosidase Os10g0493600 complete	0.024861	1	0.165176	1	-0.326297	1	-0.540941	1	-0.0709994	1	-0.150038	1	-	-4.3
52	27305	GSMUA_Achr6G18380_001	Rab GDP dissociation inhibitor alpha Gdi1 complete	-0.0445316	1	0.0662282	1	0.0462105	1	-0.134611	1	-0.248487	1	-0.121367	1	-	-3
53	28174	GSMUA_Achr6G31640_001	Succinate dehydrogenase [ubiquinone] flavoprotein subunit 1, mitochondrial SDH1-1 fragment	0.0840049	1	-0.213741	1	-0.0224233	1	-0.0194953	1	-0.709125	1	-0.427984	1	-	-2.8
54	28473	GSMUA_Achr6G36400_001	Caffeoyl-CoA O-methyltransferase CCOAOMT complete	-0.0974821	1	0.283909	1	0.448801	1	0.134636	1	-0.298458	1	0.03198	1	5.3
55	28615	GSMUA_Achr7G01530_001	5-methyltetrahydropteroyltriglutamate--homocysteine methyltransferase METE complete	0.0233628	1	0.104537	1	-0.0619182	1	0.209996	1	-0.303916	1	-0.189994	1	-	5.4
56	28867	GSMUA_Achr7G05460_001	Putative Methylthioribose kinase mtnK complete	0.255422	1	-0.0510627	1	-0.168019	1	-0.286395	1	-0.0602008	1	0.42237	1	-	-4.4
57	29288	GSMUA_Achr7G11740_001	Cytochrome c oxidase subunit 6B cox12 modules	-0.278395	1	0.243429	1	-0.0307598	1	-0.561593	1	0.308437	1	-0.0804908	1	-	-2.2
58	29408	GSMUA_Achr7G13650_001	Mitochondrial-processing peptidase subunit alpha MPP complete	-0.0369363	1	-0.129919	1	0.110724	1	-0.141973	1	-0.307189	1	-0.11312	1	-	-2.3
59	30926	GSMUA_Achr8G09520_001	Peroxiredoxin-2F, mitochondrial PRXIIF complete	-0.137855	1	-0.0512263	1	0.299614	1	-0.338956	1	-0.274026	1	0.238143	1	-	-2.6
60	31183	GSMUA_Achr8G13580_001	seed specific protein Bn15D1B, putative, expressed HE complete	-0.000812942	1	-0.0745587	1	-0.106484	1	-0.262502	1	0.301837	1	-0.340736	1	-	-5.2
61	31305	GSMUA_Achr8G15600_001	Putative Uncharacterized protein At4g06744 At4g06744 modules	-0.18197	1	0.476297	1	0.0460537	1	2.00137	1	-0.5843	1	-2.63708	1	-	3
62	31539	GSMUA_Achr8G19050_001	Succinyl-CoA ligase [GDP-forming] subunit beta, mitochondrial Os02g0621700 complete	-0.107824	1	0.160943	1	-0.0837098	1	-0.0336418	1	-0.456253	1	-0.0314065	1	-	-2.8
63	32656	GSMUA_Achr9G02000_001	Putative uncharacterized protein Os01g0794400 complete	-0.239849	1	0.092032	1	1.40884	1	1.43835	1	-0.419779	1	2.06369	1	-	-5.7
64	32784	GSMUA_Achr9G03960_001	Heat shock cognate 70 kDa protein HSP70 complete	0.114527	1	-0.0530247	1	-0.000117323	1	0.00405947	1	0.378378	1	-0.0687024	1	-	4.2
65	33944	GSMUA_Achr9G21710_001	ATP synthase subunit beta, mitochondrial ATPB complete	-0.0925285	1	0.0544195	1	0.25394	1	-0.200968	1	-0.38785	1	-0.0863746	1	-	-2
66	34041	GSMUA_Achr9G23240_001	RuBisCO large subunit-binding protein subunit beta, chloroplastic At1g55490 complete	0.110092	1	-0.303962	1	-0.235813	1	-0.216984	1	-0.32246	1	0.156479	1	-	12.3
67	34805	GSMUA_AchrUn_randomG02470_001	70 kDa peptidyl-prolyl isomerase ROF1 complete	1.53e-15	1	-9.03e-17	1	2.57e-16	1	-7.18e-17	1	-2.24e-15	1	0.261422	1	-	Detected only in Inoculated sample
68	35537	GSMUA_AchrUn_randomG09450_001	40S ribosomal protein S2-4 RPS2D modules	1.53e-15	1	-9.03e-17	1	2.57e-16	1	-7.18e-17	1	-2.24e-15	1	-0.190682	1	-	Detected only in Inoculated sample
69	35705	GSMUA_AchrUn_randomG11080_001	Delta-1-pyrroline-5-carboxylate dehydrogenase 12A1, mitochondrial ALDH12A1 complete	1.53e-15	1	-9.03e-17	1	2.57e-16	1	-7.18e-17	1	-2.24e-15	1	-0.0681653	1	-	-5.8
70	36136	GSMUA_AchrUn_randomG15230_001	ATP synthase subunit alpha, mitochondrial ATPA complete	1.53e-15	1	-9.03e-17	1	2.57e-16	1	-7.18e-17	1	-2.24e-15	1	-0.22899	1	-	-1.5
71	36885	GSMUA_AchrUn_randomG22440_001	ATP-dependent Clp protease ATP-binding subunit clpC homolog, chloroplastic CD4B modules	1.53e-15	1	-9.03e-17	1	2.57e-16	1	-7.18e-17	1	-2.24e-15	1	0.346525	1	-	-2.4
1	7754	GSMUA_Achr8G06200_001	S-adenosylmethionine synthase SAMS missing_completeness	-0.401042	0.857739	0.362622	1	0.0442377	1	-0.199763	1	0.150159	1	0.0750326	1	No match in proteomics data
2	14997	GSMUA_Achr11G00770_001	Peptidyl-prolyl cis-trans isomerase Pin1 PIN1 complete	-0.0919069	1	0.319191	1	0.126165	1	-0.533289	1	0.220082	1	0.0857275	1
3	21713	GSMUA_Achr3G26750_001	Probable calcium-binding protein CML7 CML7 complete	-0.0404914	1	0.0316711	1	0.168401	1	-0.162727	1	0.0845307	1	0.0726953	1
4	25767	GSMUA_Achr5G24410_001	Elongation factor 1-alpha EF1 fragment	0.0182412	1	0.479927	1	0.478963	1	-0.203222	1	-0.369683	1	-8.12e-17	1
5	26823	GSMUA_Achr6G11110_001	Eukaryotic translation initiation factor 5A-2 EIFSV1 fragment	1.53e-15	1	-9.03e-17	1	2.57e-16	1	-7.18e-17	1	-2.24e-15	1	-2.76293	1
6	30801	GSMUA_Achr8G07620_001	Fructose-bisphosphate aldolase cytoplasmic isozyme FBA complete	0.145898	1	0.0183413	1	0.129102	1	-0.145059	1	0.0680026	1	-0.413066	1
